# Supplementary material for: Urbanization and cardiovascular health among Indigenous groups in Brazil
Source: PubMed Central journal article supplement (PMC9895427; doi:10.1038/s43856-023-00239-3), 2023-02-02
Supplement: 43856_2023_239_MOESM3_ESM.pdf [file 43856_2023_239_MOESM3_ESM.pdf]

## Description of Additional Supplementary Files

**Supplementary Data 1** - Clinical parameters for Fulni-ô Indigenous people, Truká Indigenous people and urban non-Indigenous population. Brazil.

Legend: BMI – body mass index; NC- neck circumference; WC - waist circumference; HC – hip circumference; WHR - waist-to-hip ratio; SBD – systolic blood pressure; DBP – diastolic blood pressure; MAP – mean arterial pressure; ABI - Ankle-brachial index. <sup>(1)</sup> chi-squared continuity correction; <sup>(1a)</sup> chi-squared continuity correction (sex comparasion); <sup>(2)</sup> Kuskal-Wallis test.

**Supplementary Data 2** - Source data for Figure 2.

Legend: Total population (n = 999): Fulni-ô People (n = 303; 30.3%); the intermediate Truká Indigenous group (n = 336; 33.7%); highly urbanized cohort living in the city of Juazeiro (n = 360; 36.0%). \*Control group refers to the urban non-Indigenous population
